# Supplementary material for: Predictors of Function, Activity, and Participation of Stroke Patients Undergoing Intensive Rehabilitation: A Multicenter Prospective Observational Study Protocol
Source: PubMed Central journal article supplement (PMC8060493; doi:10.3389/fneur.2021.632672), 2021-04-08
Supplement: Data_Sheet_2.pdf [file Data_Sheet_2.pdf]

Table 1: Supplementary material, Evaluation tools references

| <b>Area of competence</b>               | <b>Evaluation tool</b>                                  | <b>Acronym</b>                                                                                                                                                                                    | <b>Reference</b>                                                                                                                                                                                                                                                         |
|-----------------------------------------|---------------------------------------------------------|---------------------------------------------------------------------------------------------------------------------------------------------------------------------------------------------------|--------------------------------------------------------------------------------------------------------------------------------------------------------------------------------------------------------------------------------------------------------------------------|
| <b>Clinical and nursing complexity</b>  | Cumulative Illness Rating Scale                         | CIRS                                                                                                                                                                                              | Linn BS, Linn MW, Gurel L. CUMULATIVE ILLNESS RATING SCALE. Journal of the American Geriatrics Society. maggio 1968;16(5):622–6.                                                                                                                                         |
|                                         | Markers of complexity                                   | /                                                                                                                                                                                                 | Banchero A, Baratto L, Bellelli G, Bellia C, Bernardini B, Bressi M, et al. IPER2: Indicatori di processo e di Esito in Riabilitazione. :76.                                                                                                                             |
|                                         | Functional Oral Intake Scale/water swallow test         | FOIS                                                                                                                                                                                              | Crary MA, Mann GD, Groher ME. Initial psychometric assessment of a functional oral intake scale for dysphagia in stroke patients. Arch Phys Med Rehabil. 2005 Aug;86(8):1516-20. doi: 10.1016/j.apmr.2004.11.049. PMID: 16084801.                                        |
|                                         | Numeric Pain Scale/pain assessment in advanced dementia | NRS                                                                                                                                                                                               | High AS, Macgregor AJ, Tomlinson GE, Salkouskis PM. A gnathodynamometer as an objective means of pain assessment following wisdom tooth removal. British Journal of Oral and Maxillofacial Surgery. agosto 1988;26(4):284–91.                                            |
|                                         |                                                         | PAINAD                                                                                                                                                                                            | Costardi D, Rozzini L, Costanzi C, Ghianda D, Franzoni S, Padovani A, et al. The Italian version of the pain assessment in advanced dementia (PAINAD) scale. Archives of Gerontology and Geriatrics. marzo 2007;44(2):175–80.                                            |
|                                         | Hospital Anxiety Depression Scale                       | HADS                                                                                                                                                                                              | Snaith RP. The Hospital Anxiety And Depression Scale. Health Qual Life Outcomes. 2003;1:29. Published 2003 Aug 1. doi:10.1186/1477-7525-1-29                                                                                                                             |
| Stroke Aphasia Depression Questionnaire | SADQ-10                                                 | Lincoln, Nadina & Sutcliffe, L.M. & Unsworth, G.. (2000). Validation of the Stroke Aphasic Depression Questionnaire (SADQ) for use with patients in hospital. Clin Neuropsychol Assess. 1. 88-96. |                                                                                                                                                                                                                                                                          |
| <b>Neurological profile</b>             | National Institutes of Health Stroke Scale              | NIHSS                                                                                                                                                                                             | Goldstein LB, Samsa GP. Reliability of the National Institutes of Health Stroke Scale: Extension to Non-Neurologists in the Context of a Clinical Trial. Stroke. febbraio 1997;28(2):307–10.                                                                             |
|                                         | Trial of Organization in Acute Stroke Treatment         | TOAST                                                                                                                                                                                             | Adams HP, Bendixen BH, Kappelle LJ, Biller J, Love BB, Gordon DL, et al. Classification of subtype of acute ischemic stroke. Definitions for use in a multicenter clinical trial. TOAST. Trial of Org 10172 in Acute Stroke Treatment. Stroke. gennaio 1993;24(1):35–41. |
|                                         | Oxfordshire Community Stroke Project                    | OCSP                                                                                                                                                                                              | Anderson CS, Taylor BV, Hankey GJ, Stewart-Wynne EG, Jamrozik KD. Validation of a clinical classification for subtypes of acute cerebral infarction. Journal of Neurology, Neurosurgery & Psychiatry. 1 ottobre 1994;57(10):1173–9.                                      |
| <b>Functional evaluation</b>            | Trunk Control Test                                      | TCT                                                                                                                                                                                               | Franchignoni FP, Tesio L, Ricupero C, Martino MT. Trunk Control Test as an Early Predictor of Stroke Rehabilitation Outcome. Stroke. luglio 1997;28(7):1382–5.                                                                                                           |
|                                         | Fulg-Meyer Assessment scale                             | FMA                                                                                                                                                                                               | Cecchi F, Carrabba C, Bertolucci F, Castagnoli C, Falsini C, Gnetti B, et al. Transcultural translation and validation of Fulg-Meyer assessment to Italian. Disability and Rehabilitation. 1 maggio 2020;1–6.                                                            |

|                                      |                                                                      |      |                                                                                                                                                                                                                                                                                                                      |
|--------------------------------------|----------------------------------------------------------------------|------|----------------------------------------------------------------------------------------------------------------------------------------------------------------------------------------------------------------------------------------------------------------------------------------------------------------------|
|                                      | Short Physical Performance Battery                                   | SPPB | Guralnik JM, Simonsick EM, Ferrucci L, Glynn RJ, Berkman LF, Blazer DG, et al. A Short Physical Performance Battery Assessing Lower Extremity Function: Association With Self-Reported Disability and Prediction of Mortality and Nursing Home Admission. <i>Journal of Gerontology</i> . 1 marzo 1994;49(2):M85–94. |
|                                      | Modified Barthel Index                                               | MBI  | Shah S, Vanclay F, Cooper B. Improving the sensitivity of the Barthel Index for stroke rehabilitation. <i>Journal of Clinical Epidemiology</i> . gennaio 1989;42(8):703–9.                                                                                                                                           |
|                                      | Modified Rankin scale                                                | MRS  | Quinn TJ, Dawson J, Walters MR, Lees KR. Exploring the Reliability of the Modified Rankin Scale. <i>Stroke</i> . marzo 2009;40(3):762–6.                                                                                                                                                                             |
|                                      | Scale of disability in communication                                 | SDC  | Scale of disability in communication Meinecke C, Cappadonia C, Bernardini B. Validazione di una semplice scala di impairment comunicativo nell'anziano. In: XXIII Congresso Nazionale SIMFER Valutazione e qualità dell'assistenza in Medicina Riabilitativa. Ancona; 1995. p. 56–7.                                 |
|                                      | Functional Ambulation Categories                                     | FAC  | Geyh S, Kurt T, Brockow T, Cieza A, Ewert T, Omar Z, et al. Identifying the concepts contained in outcome measures of clinical trials on stroke using the international classification of functioning, disability and health as a reference. <i>Journal of Rehabilitation Medicine</i> . 1 agosto 2004;36(0):56–62.  |
|                                      | Medical Research Council scale                                       | MRC  | Medical Research Council of the United Kingdom. Palo Alto, Calif: Pedragon House; 1978.                                                                                                                                                                                                                              |
|                                      | Activity of Daily Living disabilities: Frenchay Activity Index       | FAI  | Monteiro M, Maso I, Sasaki AC, Barreto Neto N, Oliveira Filho J, Pinto EB. Validation of the Frenchay activity index on stroke victims. <i>Arq Neuro-Psiquiatr</i> . marzo 2017;75(3):167–71                                                                                                                         |
|                                      | Activity of Daily Living disabilities: Functional Walking Categories | FWC  | Perry J, Garrett M, Gronley JK, Mulroy SJ. Classification of Walking Handicap in the Stroke Population. <i>Stroke</i> . giugno 1995;26(6):982–9.                                                                                                                                                                     |
| <b>Neuropsychological evaluation</b> | Montreal Cognitive Assessment                                        | MoCA | Santangelo G, Siciliano M, Pedone R, Vitale C, Falco F, Bisogno R, et al. Normative data for the Montreal Cognitive Assessment in an Italian population sample. <i>Neurol Sci</i> . aprile 2015;36(4):585–91.                                                                                                        |
|                                      | Oxford Cognitive Screening                                           | OCS  | the Italian OCS Group, Mancuso M, Varalta V, Sardella L, Capitani D, Zoccolotti P, et al. Italian normative data for a stroke specific cognitive screening tool: the Oxford Cognitive Screen (OCS). <i>Neurol Sci</i> . ottobre 2016;37(10):1713–21.                                                                 |
